# Supplementary material for: Impact of Chronic Tetracycline Exposure on Human Intestinal Microbiota in a Continuous Flow Bioreactor Model
Source: MDPI journal article supplement (doi:10.3390/antibiotics10080886), 2021-07-21
Supplement: s1 [file s1]

## Supplementary Material

# Impact of Chronic Tetracycline Exposure on Human Intestinal Microbiota in a Continuous Flow Bioreactor Model

Youngbeom Ahn <sup>1,\*†</sup>, Ji Young Jung <sup>1,†‡</sup>, Ohgew Kweon <sup>1</sup>, Brian T. Veach <sup>2</sup>, Sangeeta Khare <sup>1</sup>, Kuppan Gokulan <sup>1</sup>, Silvia A. Piñeiro <sup>3</sup> and Carl E. Cerniglia <sup>1</sup>

<sup>1</sup> Division of Microbiology, National Center for Toxicological Research, U.S. Food and Drug Administration, Jefferson, AR 72079, USA; jyjung@nnibr.re.kr (J.Y.J.); oh-gew.kweon@fda.hhs.gov (O.K.); sangeeta.khare@fda.hhs.gov (S.K.); kuppan.gokulan@fda.hhs.gov (K.G.); carl.cerniglia@fda.hhs.gov (C.E.C.)

<sup>2</sup> Office of Regulatory Affairs, Arkansas Laboratory, U.S. Food and Drug Administration, Jefferson, AR 72079, USA; brian.veach@fda.hhs.gov

<sup>3</sup> Division of Human Food Safety, Center for Veterinary Medicine, U.S. Food and Drug Administration, Rockville, MD 72079, USA; Silvia.Pineiro@fda.hhs.gov

\* Correspondence: young.ahn@fda.hhs.gov; Tel.: +1-870-540-7084

† These authors contributed equally to this work

‡ Present address: Environmental Microbiology Research Team, Microbial Research Department, Nakdong-gang National Institute of Biological Resources (NNIBR), 137, Donam 2-gil, Sangju-si, Gyeongsangbuk-do 37242, Republic of Korea

**Table S1.** Nominal levels of test compound added to the medium and measured by bioassay (mean level,  $n = 3$ ).

| Equivalent daily dose<br>(mg/60 kg person/d) | Tetracycline (µg/ml) |              |
|----------------------------------------------|----------------------|--------------|
|                                              | Added                | Recovered    |
| 0                                            | none                 | not detected |
| 0.15                                         | 0.015                | 0.015 ± 0.01 |
| 1.5 <sup>a</sup>                             | 0.15                 | 0.17 ± 0.13  |
| 15                                           | 1.5                  | 1.4 ± 0.72   |
| 150                                          | 15                   | 16 ± 1.23    |
| 1500                                         | 150                  | 154 ± 9.54   |

1.5<sup>a</sup>: the ADI was set by the U.S. FDA (FDA, 1996).

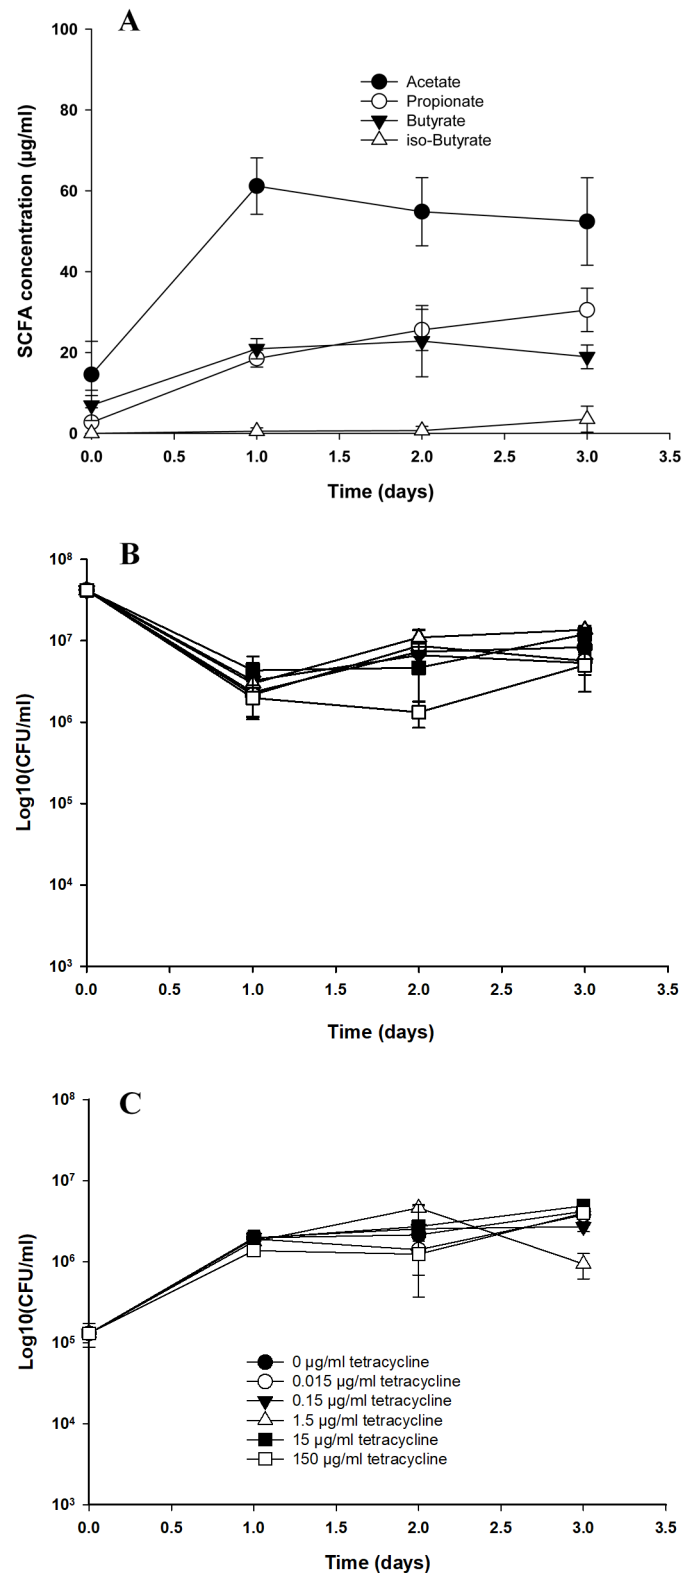

**Figure S1.** Plot of short chain fatty acid (SCFA) concentrations (A) and cell number on BHI (B) and CDC (C) for the six bioreactors over the course of the experiment.

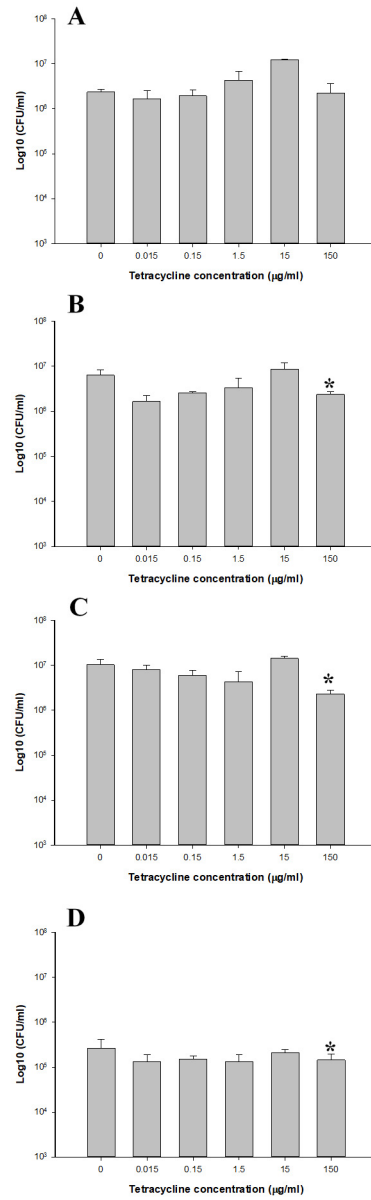

**Figure S2.** Comparison of *Fusobacterium*, *Lactobacillus*, *Eikenella corrodens* (betaproteobacteria), and *Bifidobacterium* viable counts on FSA (A), LMRS (B), CBA (C), and BIFIDO (D) in controls (no treatment) and tetracycline-treated samples after 7 days. \*Indicates statistically significant differences from control ( $p < 0.05$ ).
